# Supplementary material for: Measuring the level of cyber-security awareness for cybercrime in Saudi Arabia
Source: PubMed Central journal article supplement — Heliyon. 2021 Jan 25;7(1):e06016. doi: 10.1016/j.heliyon.2021.e06016 (PMC7841324; doi:10.1016/j.heliyon.2021.e06016), 2021-01-25
Supplement: mmc1.pdf [file mmc1.pdf]

## Appendix A. Questionnaire Parts

The survey is divided into four parts as shown below.

### Appendix A.1. Personal and skill information

This part is optional, so the subject has ability to accept or decline the following questions.

#### 1. Gender

- Male
- Female

#### 2. Age

- 18-29
- 30-39
- 40-49
- Older than 49

#### 3. Education Level

- High school
- Undergraduate
- Postgraduate
- Others

#### 4. Major

- Engineering
- Public health
- Computer science
- Education
- Languages
- Business administration
- Social science
- Low
- others, Specify:

#### 5. Administrative regions

- Riyadh
- Makkah (Western Province)
- Madina
- Qassim
- Eastern Province
- Asir
- Tabuk
- Hail
- Northern Board
- Jazan
- Najran
- Baha
- Jouf

*Note: In the analysis, we defined the **Southern Province**, which includes following regions: Asir, Jazan, Najran, and Baha, while the **Northern Province** contains Tabuk, Hail, Northern Board and Jouf.*

#### 6. How often do you use the Internet and Internet-related services?

- Frequently throughout the day
- Once or twice a day
- Less frequently once a week or month

#### 7. What is your Internet/ Digital devices skills level

- Beginner, who can go to specific web pages, utilizes social media and a few applications such as Microsoft Word.
- Intermediate, who has the ability to download applications, manages the settings of devices, and has knowledge about hardware as well as software.
- Expert, who is a computer specialist, network engineer, or database administrator.

#### 8. Of the following, which digital devices do you use regularly? Tick all that apply

- Desktop
- Laptop
- Smartphone
- Tablet
- Other,

#### 9. What type of connectivity services do you use in your daily activities? Tick all that apply

- Public Wi-Fi
- Private Wi-Fi
- Cellular
- Broadband
- I do not know

#### 10. For what purposes do you use the Internet? Tick all that apply

- Education (e.g. information-seeking such as news, articles, etc.,)
- Professional reasons (e.g. remote access VPNs)
- Social networks (such as Twitter, Facebook, Snapchat etc.,)
- Communication (such as using email, video calls)
- Entertainment (e.g. playing games)
- Online service (such as Government services, online banking, e-commerce, etc.,)

### Appendix A.2. Cybersecurity Activities

The goal of this part is measuring awareness based on assessing the IT knowledge of the participant.

#### 1. What operating systems do you use on your desktop/laptop? Tick all that apply

- Windows 10
- Windows 8
- Windows 7
- Old version of Windows
- MacOS
- Linux
- I do not know

#### 2. What operating systems do you use on your Smartphone/tablet? Tick all that apply

- Windows
- Blackberry
- Android
- iOS
- I do not know

3. **Some of the most commonly used security tools and applications for laptops, tablets, mobiles, etc. are given below. Select which of these you have used on your digital devices.**

*Tick all that apply*

- Anti-virus
- Authentication (e.g. password, PIN)
- Encryption
- Software Update
- Backup
- Firewall
- None

4. **How secure do you feel your digital devices (e.g. computers and phones) are?**

- Very secure
- Somewhat secure
- Neutral
- Somewhat insecure
- Not sure
- Not secure at all

5. **Some security practices are described below.**

*Please choose your common reaction for each practice*

I check the legitimacy of a website before accessing it

- Always
- Often
- Sometimes
- Seldom
- Never

I create a password that contains my personal information (e.g. last name, date of birth)

- Always
- Often
- Sometimes
- Seldom
- Never

I am aware of the danger when clicking on banners, advertisements or pop-up screens that appear when surfing the Internet

- Always
- Often
- Sometimes
- Seldom
- Never

I give due attention to privacy settings on my social media account(s) (e.g. Facebook)

- Always
- Often
- Sometimes
- Seldom
- Never

Social media services protect my personal information.

- Always
- Often
- Sometimes
- Seldom
- Never

I read the terms and conditions carefully before using any website.

- Always
- Often
- Sometimes
- Seldom
- Never

I change the passwords of important accounts (such as online banking) frequently.

- Always
- Often
- Sometimes
- Seldom
- Never

I feel safe when using public Wi-Fi.

- Always
- Often
- Sometimes
- Seldom
- Never

I feel my digital device (computer, smart-phone) has no value to hackers, they do not target me.

- Always
- Often
- Sometimes
- Seldom
- Never

I regularly install software updates.

- Always
- Often
- Sometimes
- Seldom
- Never

I am careful about clicking on links in an email or social media post.

- Always
- Often
- Sometimes
- Seldom
- Never

6. **What digital devices do you have Internet security on (e.g. anti-virus)?** *Tick all that apply*

- Desktop
- Laptop
- Smartphone
- Tablet
- I do not know
- None of the above

7. **If you use Internet security (e.g. anti-virus), is this kept up to date in terms of threat filters and signatures?**

- Yes, I manually updated.
- Yes, I believe it is automatically updated.
- No, I think it is automatically updated.
- I do not know.

### Appendix A.3. Cybercrime Consciousness

The goal of this part is evaluating the current awareness of the participants regarding cybercrimes by following questions.

1. **How do you keep yourself updated about cybercrime?** *Tick all that apply* . (Online sources)
  - TV, news, radio
  - Internet, website, email bulletins, blogs, etc.
  - Government websites
  - Internet service provider
  - Rely on automatic updates
  - I do not feel that I keep myself updated
  - Others, specify
2. **How do you keep yourself updated about cybercrime?** *Tick all that apply* . (Offline sources)
  - Newspapers, magazines, Posters
  - Professional activities: conferences, meetings, briefings, etc.
  - Internet service provider ISPs
  - Government or professional reports
  - I do not feel that I keep myself updated
  - Other, please specify
3. **What is your opinion of each of the following statements?** *Select the appropriate response for each*
  - I think one should avoid disclosing personal information online
    - Strongly Agree
    - Agree
    - Neutral
    - Disagree
    - Strongly Disagree
  - I feel that the risk of becoming a victim of cybercrime has increased in the past year.
    - Strongly Agree
    - Agree
    - Neutral
    - Disagree
    - Strongly Disagree
  - I am concerned that my online personal information is not secure enough
    - Strongly Agree
    - Agree
    - Neutral
    - Disagree
    - Strongly Disagree
  - I feel that I am well protected against cybercrime.
    - Strongly Agree
    - Agree
    - Neutral
    - Disagree
    - Strongly Disagree
  - I am willing to accept increased Internet surveillance from the government if it can enhance Internet security.
    - Strongly Agree

- Agree
- Neutral
- Disagree
- Strongly Disagree

I believe that the laws in effect are effective in managing the cybercrime problem.

- Strongly Agree
- Agree
- Neutral
- Disagree
- Strongly Disagree

I feel informed about the threat of cybercrime.

- Strongly Agree
- Agree
- Neutral
- Disagree
- Strongly Disagree

4. **There are several activities that constitute cybercrimes. How often have you experienced or been victim of the following situations?** *Select the appropriate response for each.*

Received phishing emails (e.g. asking for money, personal information or bank account details).

- Always
- Sometimes
- Never
- Do not know

Identity theft (somebody stealing your personal data and impersonating you, e.g. tweeting under your name).

- Always
- Sometimes
- Never
- Do not know

Malware (e.g. virus) infection of a device.

- Always
- Sometimes
- Never
- Do not know

Being unable to access online services (e.g. banking services) because of cyber attacks.

- Always
- Sometimes
- Never
- Do not know

Accidentally encountering material that promotes hatred or religious extremism.

- Always
- Sometimes
- Never
- Do not know

Online extortion (a demand for money to avert or stop extortion, or to avert scandal).

- Always
- Sometimes
- Never
- Do not know

5. **Some of the most common cybercrimes are presented below. What is your opinion of each of the following statements? Select the appropriate response for each.**

I am concerned about identity theft (somebody stealing your personal data and impersonating you, e.g. tweeting under your name).

- Always
- Sometimes
- Never
- Do not know

I am not concerned about accidentally encountering child pornography online.

- Always
- Sometimes
- Never
- Do not know

I am concerned about receiving phishing emails (e.g. asking for money, personal information or bank account details).

- Always
- Sometimes
- Never
- Do not know

I am concerned about not being able to access online services (e.g. banking services) because of cyber attacks.

- Always
- Sometimes
- Never
- Do not know

I am concerned about accidentally encountering material that promotes hatred or religious extremism.

- Always
- Sometimes
- Never
- Do not know

Online extortion (a demand for money to avert or stop extortion, or to avert scandal).

- Always
- Sometimes
- Never
- Do not know

Other, Specify

6. **What do you feel about the threat of cybercrimes in the future?**

They will become a more serious issue in the future

- The threat will vanish eventually
- No significant change
- I do not know

7. **Considering each of the following parties, please rate the extent to which you believe they are responsible for raising awareness of cyber-crime.**

- The government
  - Strongly Agree
  - Agree

- Neutral
- Disagree
- Strongly Disagree

-The media

- Strongly Agree
- Agree
- Neutral
- Disagree
- Strongly Disagree

- Those offering online/Internet-based services (e.g. banks, online retailers, telecommunication companies, etc.)

- Strongly Agree
- Agree
- Neutral
- Disagree
- Strongly Disagree

- User themself

- Strongly Agree
- Agree
- Neutral
- Disagree
- Strongly Disagree

- Education system

- Strongly Agree
- Agree
- Neutral
- Disagree
- Strongly Disagree

Others, specify:

8. **What do you think the role of the government should be in combating cybercrimes? Tick all that apply**

Have stricter laws and punishments for cybercrimes.

Make people aware of cybercrime

Monitor organizations misusing consumer information

Work towards providing a global cyber-security framework

No role

I do not know

*Appendix A.4. Case Reports*

This part examined whether the participants had been a victim of a cyber-attack or not based on following questions.

1. **Have you been a victim of cybercrime? (E.g. lost data or email account, device infected with virus or spyware, stole your picture/s or digital device/s).**

- Yes
- No

2. **A. If Yes, When you had been a victim of cybercrime, did you report it?**

- Yes
- No

3. **A1. If Yes, To whom did you report or contact?** *Tick all that apply*
- Saudi CERT
  - Police
  - Committee for the Promotion of Virtue and the Prevention of Vice
  - Saudi eGovernment Portal
  - No one
  - Others
4. **A2. If No, What was/were the reason/s?** *Tick all that apply*
- I did not know how to describe or write reports about cybercrime
  - I did not know how to write reports about cybercrime
  - I did not know what the impact on me will be
  - I think that there is no value to reporting
  - I fixed the problem by myself
  - It was my fault to trust an unauthorized person
  - Not sure
  - I did not know what the crime was
  - I did not trust the third party
  - I feel it is waste of time
  - Others
5. **B. If No, If you become a victim of cybercrime would you like to report it?**
- Yes, I would
  - No, I would not
6. **B1. If Yes, To whom would you report or contact?** *Tick all that apply*
- Committee for the Promotion of Virtue and the Prevention of Vice
  - Saudi eGovernment Portal
  - Saudi CERT
  - Police
  - Committee for the Promotion of Virtue and the Prevention of Vice
  - Dont know but will ask friends for advice
  - Others
7. **B2. If No, What is/are the reason/s?** *Tick all that apply*
- I do not know what the crime was
  - I do not know who to write report about cybercrime
  - I do not know what the impact on me will be
  - I do not know how to describe or write reports about cybercrime
  - I feel it is a waste of time
  - I think that there is no value to reporting
  - I do not trust the third party
  - I fixed the problem by myself
  - Not sure
  - Other
